# Supplementary material for: Unlocking Nature’s Secrets: Molecular Insights into Postharvest Pathogens Impacting Moroccan Apples and Innovations in the Assessment of Storage Conditions
Source: MDPI journal article supplement (doi:10.3390/plants13040553), 2024-02-18
Supplement: s1 [file s1]

Supplementary Materials

**Table S1.** Detailed information on fungal isolates that cause postharvest apple diseases identified by sequencing the partial  $\beta$ -tubulin gene.

| Isolate code | Species                     | Sampling year | Origin | GPS coordinates                        | Accession number | Similarity percent-age |
|--------------|-----------------------------|---------------|--------|----------------------------------------|------------------|------------------------|
| MY2          | <i>Neofabraea vagabunda</i> | 2022          | Meknes | N 33° 59' 36,8088" W<br>5° 12' 2,4948" | OR753458         | 99,72% (OL740379)      |
| Aby4         | <i>Penicillium expansum</i> | 2021          | Midelt | N 32° 45' 2,2896" W<br>5° 1' 45,1776"  | OL802926         | 100% (MZ393463)        |

**Table S2.** Specific information on the  $\beta$ -tubulin and AMT4-EMR markers used in this investigation. Detailed PCR conditions can be found in the bibliographic references listed.

| Partial gene name | Code of Primers | Sequence                 | Annealing T° | Reference |
|-------------------|-----------------|--------------------------|--------------|-----------|
| $\beta$ -tubulin  | Bt2a            | GGTAACCAAATCGGTGCTGCTTTC | 58           | [79]      |
|                   | Bt2b            | ACCCTCAGTGTAGTGACCCTTGGC |              |           |
| AMT4-EMR          | AMT4-EMR-F      | CTCGACGACGGTTTGGAGAA     | 66           | [80]      |
|                   | AMT4-EMR-R      | TTCCTTCGCATCAATGCCCT     |              |           |
